# Supplementary material
Source: publisher figshare collection journal article supplement (https://gsapubs.figshare.com/ndownloader/files/22747232)
Supplement: Supplementary file 1 [file 22747232]

# **Supplementary material for GSA Data Repository:**

Initial random coordinates were generated according to uniform distributions within the valley fills of the upper and lower reaches, respectively. For each reach, initial points that fell outside the surveyed geometry of the fill were discarded. Longitudinal (downstream) coordinates were restricted to surveyed cross-sections. Lateral (cross-valley) coordinates had to lie within the measured valley width. Vertical (height above bedrock) coordinates had to fall below the surface of the fill. The first 30 generated points that fell within the fill of each reach were accepted and used to determine the actual sampling locations, which were then determined by substituting positions of the right or left banks (with equal probability unless only one of the banks was high enough) for the lateral coordinates. The number of sampling points was that deemed necessary to robustly characterize the respective distributions (a “large number”). Because that number is the same regardless of the volume, the upper reach, with a lower total volume, was sampled more densely than the lower reach.

Details of the radiocarbon dating, including calibrated age ranges, are shown in Table 1.

Note that, according to Gavin (2001), age estimates may reflect “inbuilt ages” of as much as 600 years due to the longevity of trees in the Pacific Northwest. That is, wood from the center of a 600-year-old tree will, upon sampling, produce an age estimate of at least 600 years, which is its inbuilt age.

## **REFERENCES CITED**

- Hua, Q., and Barbetti, M., 2004, Review of tropospheric bomb C-14 data for carbon cycle modeling and age calibration purposes: Radiocarbon, v. 46, p. 1273–1298.
- Reimer, P.J., Baillie, M.G.L., Bard, E., Bayliss, A., Beck, J.W., Bertrand, C., Blackwell, P.G., Buck, C.E., Burr, G., Cutler, K.B., Damon, P.E., Edwards, R.L., Fairbanks, R.G., Friedrich, M., Guilderson, T.P., Hughen, K.A., Dromer, B., McCormac, F.G., Manning, S., Bronk Ramsey, C., Reimer, R.W., Remmele, S., Southon, J.R., Stuiver, M., Talamo,

26 S., Taylor, F.W., van der Plicht, J., and Weyhermeyer, C.E., 2004, IntCal04 terrestrial  
27 radiocarbon age calibration, 0–26 cal kyr BP: Radiocarbon, v. 46, p. 1029–1050.

28

29

30

TABLE 1. RADIOCARBON SAMPLES, LOCATIONS, CHARACTERISTICS, AGES, AND CALENDAR DATES

| R <sup>+</sup> | Station | Dist. <sup>†</sup><br>(m) | B <sup>§</sup> | Height <sup>#</sup><br>(m) | Facies <sup>**</sup> | Mat. <sup>††</sup> | Meth. <sup>§§</sup> | Mass<br>(g) | Lab<br>Number | Radiocarbon<br>age ± 1σ <sup>###</sup> | Calibrated age range<br>(1σ) |
|----------------|---------|---------------------------|----------------|----------------------------|----------------------|--------------------|---------------------|-------------|---------------|----------------------------------------|------------------------------|
| L              | BC-1    | 44                        | R              | 0.45                       | FG                   | dw                 | INF                 | 0.33        |               | 60 ± 50                                | 1696– 1918 AD                |
|                | BC-2    | 147                       | R              | 1.7                        | DF                   | dc                 | AMS                 | 0.23        | AA57073       | 410 ± 34                               | 1440– 1611 AD                |
|                | BC-3    | 147                       | L              | 0.3                        | FG                   | dc                 | AMS                 | 0.29        | AA57074       | 1970 ± 36                              | 19 BC– 73 AD                 |
|                | BC-4    | 94                        | L              | 0.8                        | FF                   | dc                 | AMS                 | 1.13        | AA57075       | 179 ± 30                               | 1668– 1952 AD                |
|                | BC-5    | 236                       | R              | 1.3                        | DF                   | dc                 | AMS                 | 0.12        | AA57076       | 1706 ± 27                              | 262– 389 AD                  |
|                | BC-6    | 294                       | L              | 0.01                       | FG                   | sl br              | BD                  | 60.48       | B184181       | 130 ± 50                               | 1682– 1938 AD                |
|                | BC-7    | 430                       | R              | 1.7                        | DF                   | dc                 | AMS                 | 0.27        | AA57077       | 1056 ± 29                              | 973– 1020 AD                 |
|                | BC-8    | 429                       | L              | 0.8                        | FG                   | dc                 | AMS                 | 0.45        | AA57078       | 205 ± 30                               | 1655– 1953 AD                |
|                | BC-9    | 473                       | R              | 2.5                        | DF                   | dc                 | AMS                 | 0.15        | AA57079       | 1044 ± 32                              | 980– 1023 AD                 |
|                | BC-10   | 473                       | R              | 0.7                        | FG                   | dc                 | AMS                 | 0.01        | AA57080       | 2334 ± 33                              | 412– 375 BC                  |
|                | BC-11   | 533                       | L              | 0.7                        | FF                   | dc                 | AMS                 | 0.26        | AA57081       | 3401 ± 33                              | 1741– 1664 BC                |
|                | BC-12   | 533                       | L              | 2.1                        | FF                   | dc                 | AMS                 | 0.26        | AA57082       | 2913 ± 32                              | 1190– 1045 BC                |
|                | BC-13   | 640                       | R              | 1                          | DF                   | dw                 | AMS                 | 2           | AA57083       | 437 ± 29                               | 1433– 1464 AD                |
|                | BC-14   | 700                       | R              | 1.0                        | DF                   | W                  | BD                  | 29.89       | B184182       | 450 ± 50                               | 1415– 1482 AD                |
|                | BC-15   | 700                       | L              | 1.2                        | FF                   | wb                 | BD                  | 26.95       | B184183       | 110 ± 50                               | 1688– 1927 AD                |
|                | BC-16   | 700                       | L              | 0.2                        | FG                   | sl br              | BD                  | 38.5        | B184184       | 130 ± 50                               | 1682– 1938 AD                |
|                | BC-17   | 727                       | L              | 1.2                        | DF                   | dc                 | AMS                 | 0.33        | AA57084       | 1474 ± 29                              | 563– 621 AD                  |
|                | BC-18   | 731                       | L              | 2.2                        | DF                   | dc                 | AMS                 | 0.14        | AA57085       | 1877 ± 31                              | 77– 210 AD                   |
|                | BC-19   | 727                       | R              | 0.5                        | DF                   | dc                 | AMS                 | 0.12        | AA57086       | 816 ± 30                               | 1211– 1262 AD                |
|                | BC-20   | 789                       | L              | 0.2                        | FF                   | dc                 | AMS                 | 0.8         | AA57087       | 3769 ± 30                              | 2273– 2138 BC                |
|                | BC-21   | 858                       | R              | 0.25                       | FF                   | sl br              | BD                  | 20.91       | B184185       | 370 ± 50                               | 1453– 1626 AD                |
|                | BC-22   | 894                       | R              | 0.7                        | FF                   | dc                 | AMS                 | 0.34        | AA57088       | 201 ± 44                               | 1652– 1953 AD                |
|                | BC-23   | 1101                      | R              | 0                          | FG                   | wb                 | BD                  | 54.14       | B184186       | 180 ± 50                               | 1661– 1953 AD                |
|                | BC-24   | 971                       | L              | 1.5                        | FF                   | dc                 | AMS                 | 0.39        | AA57089       | 2491 ± 25                              | 758– 544 BC                  |
|                | BC-25   | 959                       | R              | 1.7                        | DF                   | dc                 | AMS                 | 0.04        | AA57090       | 2670 ± 27                              | 836– 801 BC                  |
|                | BC-26   | 94                        | L              | 0.3                        | FG                   | dc                 | AMS                 | 0.02        | AA57091       | 4447 ± 40                              | 3314– 2942 BC                |
|                | BC-27   | 46                        | R              | 0.25                       | FG                   | w                  | BD                  | 147.61      | B184187       | 60 ± 50                                | 1696– 1918 AD                |
|                | BC-28   | 1100                      | R              | 0.5                        | FG                   | br                 | INF                 | 3.08        |               | 180 ± 50                               | 1661– 1953 AD                |
|                | BC-29   | 94                        | L              | 1                          | FF                   | dw                 | INF                 | 2.9         |               | 179 ± 30                               | 1668– 1952 AD                |
|                | BC-30   | 538                       | R              | 0.15                       | FG                   | dc                 | AMS                 | 0.15        | AA57092       | 1267 ± 31                              | 690– 772 AD                  |
| U              | BC-31   | 1298                      | L              | 0.5                        | FG                   | dw                 | AMS                 | 3.51        | AA57093       | 103.88 ± 0.37 <sup>*</sup>             | 1956– 1957 AD                |
|                | BC-32   | 1365                      | L              | 0.8                        | DF                   | dc                 | AMS                 | 0.17        | AA57094       | 402 ± 31                               | 1444– 1611 AD                |
|                | BC-33   | 1365                      | L              | 1.5                        | DF                   | dc                 | AMS                 | 0.08        | AA57095       | 1532 ± 31                              | 440– 576 AD                  |
|                | BC-34   | 1365                      | L              | 3.1                        | DF                   | dc                 | AMS                 | 0.45        | AA57096       | 1128 ± 31                              | 889– 971 AD                  |
|                | BC-35   | 1365                      | R              | 0.6                        | DF                   | dw                 | AMS                 | 0.25        | AA57097       | 623 ± 34                               | 1297– 1393 AD                |
|                | BC-36   | 1405                      | R              | 0.6                        | DF                   | dc                 | AMS                 | 0.02        | AA57098       | 2443 ± 33                              | 731– 413 BC                  |
|                | BC-37   | 1405                      | L              | 3.8                        | DF                   | dc                 | AMS                 | 0.05        | AA57099       | 655 ± 30                               | 1286– 1387 AD                |
|                | BC-38   | 1496                      | R              | 1                          | DF                   | dc                 | AMS                 | 0.04        | AA57100       | 213 ± 30                               | 1650– 1953 AD                |
|                | BC-39   | 1496                      | R              | 1.7                        | DF                   | dc                 | INF                 | 0.03        |               | 213 ± 30                               | 1650– 1953 AD                |
|                | BC-40   | 1499                      | R              | 0.7                        | DF                   | dc                 | INF                 | 0.04        |               | 213 ± 30                               | 1650– 1953 AD                |
|                | BC-41   | 1485                      | R              | 0.1                        | DF                   | dc                 | INF                 | 0.04        |               | 213 ± 30                               | 1650– 1953 AD                |
|                | BC-42   | 1492                      | R              | 1                          | DF                   | dc                 | INF                 | 0.02        |               | 213 ± 30                               | 1650– 1953 AD                |
|                | BC-43   | 1496                      | R              | 2.5                        | DF                   | dc                 | AMS                 | 0.02        | AA57101       | 3741 ± 35                              | 2200– 2050 BC                |
|                | BC-44   | 1541                      | L              | 1.5                        | DF                   | dc                 | AMS                 | 0.01        | AA57102       | 167 ± 30                               | 1668– 1950 AD                |
|                | BC-45   | 1541                      | L              | 2.5                        | DF                   | sl br              | INF                 | 7.45        |               | 167 ± 30                               | 1668– 1950 AD                |
|                | BC-46   | 1597                      | R              | 1                          | DF                   | dw                 | AMS                 | 2.37        | AA57103       | 126 ± 30                               | 1684– 1931 AD                |
|                | BC-47   | 1597                      | R              | 1.3                        | DF                   | w                  | INF                 | 9.24        |               | 126 ± 30                               | 1684– 1931 AD                |
|                | BC-48   | 1600                      | R              | 1                          | DF                   | dc                 | INF                 | 0.06        |               | 126 ± 30                               | 1684– 1931 AD                |
|                | BC-49   | 1884                      | R              | 1                          | DF                   | w                  | AMS                 | 5.15        | AA57104       | 119.94 ± 0.44 <sup>*</sup>             | 1985– 1988 AD                |
|                | BC-50   | 1922                      | R              | 0.7                        | DF                   | br                 | BD                  | 50.68       | B184188       | 116.99 ± 0.65 <sup>*</sup>             | 1958– 1990 AD                |
|                | BC-51   | 2000                      | R              | 1.7                        | DF                   | sl br              | AMS                 | 6.85        | AA57105       | 437 ± 41                               | 1426– 1481 AD                |
|                | BC-52   | 2000                      | L              | 0.1                        | DF                   | br                 | BD                  | 15.35       | B184189       | 111.78 ± 0.78 <sup>*</sup>             | 1958– 1997 AD                |
|                | BC-53   | 2029                      | L              | 1                          | DF                   | wb                 | BD                  | 11.75       | B184190       | 40 ± 60                                | 1696– 1919 AD                |
|                | BC-54   | 2572                      | R              | 2.4                        | DF                   | sl br              | BD                  | 133.64      | B184191       | 510 ± 50                               | 1330– 1445 AD                |
|                | BC-55   | 1667                      | R              | 0.55                       | DF                   | sv                 | INF                 | N/A         |               | N/A                                    | 1996– 1997 AD                |
|                | BC-56   | 1667                      | R              | 1.5                        | DF                   | sv                 | INF                 | N/A         |               | N/A                                    | 1996– 1997 AD                |
|                | BC-57   | 1667                      | L              | 0.16                       | DF                   | sv                 | INF                 | N/A         |               | N/A                                    | 1996– 1997 AD                |
|                | BC-58   | 1667                      | L              | 0.21                       | DF                   | sv                 | INF                 | N/A         |               | N/A                                    | 1996– 1997 AD                |
|                | BC-59   | 1714                      | R              | 0.41                       | DF                   | sv                 | INF                 | N/A         |               | N/A                                    | 1996– 1997 AD                |
|                | BC-60   | 1714                      | R              | 0.93                       | DF                   | sv                 | INF                 | N/A         |               | N/A                                    | 1996– 1997 AD                |

R = valley reach of sample location; L = lower reach; U = upper reach.

<sup>†</sup> Dist. = sample location's distance upstream from outlet.<sup>§</sup> B = bank from which sample was taken; R = right bank; L = left bank.<sup>#</sup> Height above bedrock-sediment interface.<sup>\*\*</sup> Facies from which samples were taken; DF = debris-flow deposit; FF = fluviually deposited fines; FG = coarse fluvial gravel.<sup>††</sup> Mat. = material from which age estimate was derived; dw = detrital wood; dc = detrital charcoal; w = wood; sl br = streamlined wood branch; br = branch; wb = wood bark; sv = surface vegetation (no sample taken from massive, unincised deposit; age derived from apparent age of surface vegetation).<sup>§§</sup> Meth. = method by which age estimate derived; AMS = age determination by accelerator mass spectrometry at NSF-University of Arizona Accelerator Mass Spectrometer Facility; BD = beta decay counting by Beta Analytic; INF = inference on the basis of relative stratigraphic position.<sup>###</sup> Ages are radiocarbon years before present (1950 AD) with one standard deviation calculated error based on combined measurements of the sample, background and modern reference standards except “\*” denotes post-bomb (post-1950 AD) results in percent modern radiocarbon.<sup>\*\*\*</sup> Calibrated ages given in 1-σ ranges (68.2% probability) of calendar dates obtained from IntCal04 calibration curve (Reimer et al., 2004) for pre-1950 AD and Bomb04NH1 (Hua and Barbetti, 2004) for post-1950 AD radiocarbon ages.
